# Supplementary material for: Super-resolution localization microscopy of radiation-induced histone H2AX-phosphorylation in relation to H3K9-trimethylation in HeLa cells
Source: Royal Society of Chemistry journal article supplement (doi:10.1039/c7nr08145f), 2018-01-01
Supplement: c7nr08145f1.pdf [file c7nr08145f1.pdf]

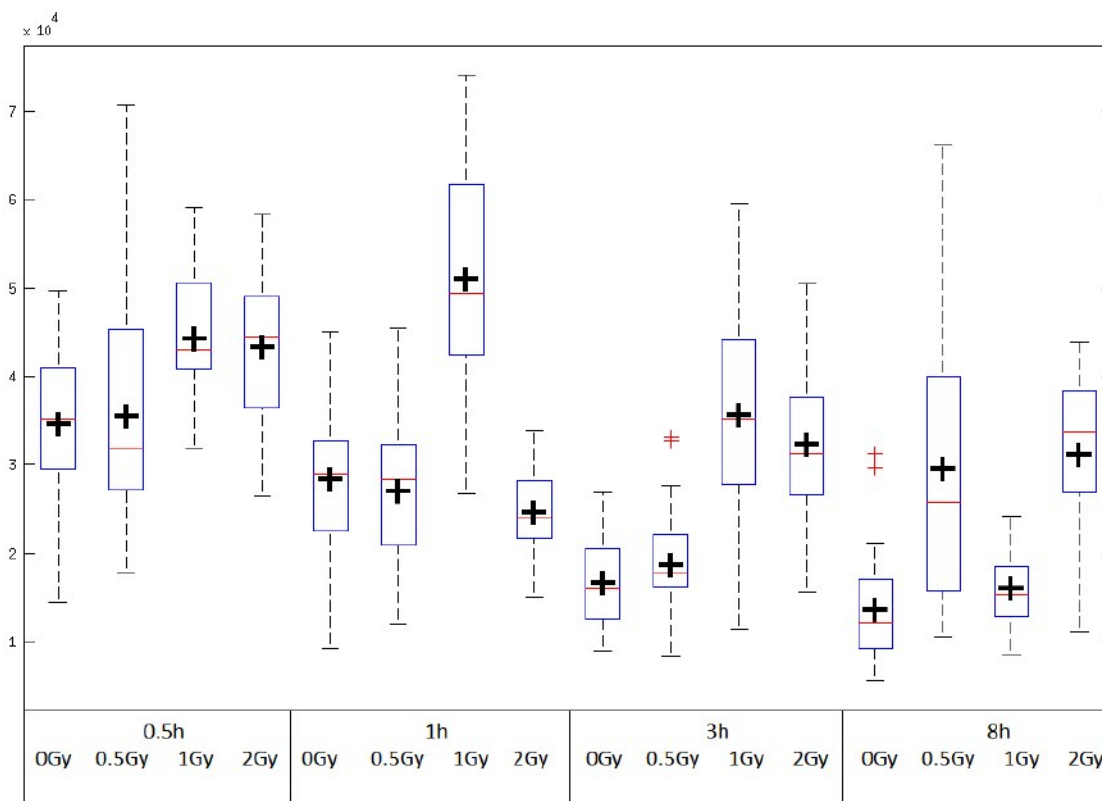

Supplementary Material:

Box plots of the numbers of heterochromatin points:

+ = mean values; - = median values
